# Supplementary material
Source: PubMed Central journal article supplement (PMC4187937)

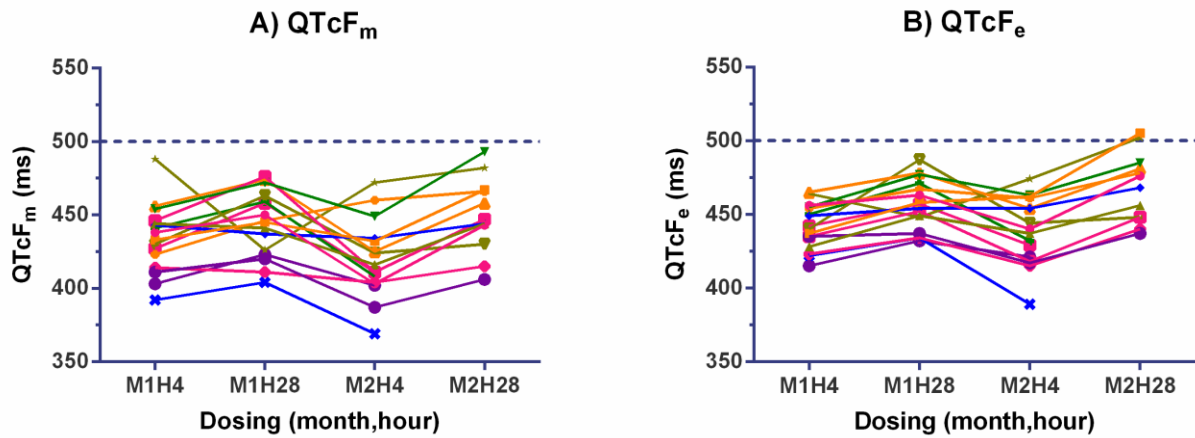

**Figure S1.** QTcF<sub>m</sub> (A) and QTcF<sub>e</sub> (B) measurements at the following timepoints: 4 hours after the first daily dose during Month 1 (Month 1, Hour 4 [M1H4]), 4 hours after the second daily dose during Month 1 (Month 1, Hour 28 [M1H28]), 4 hours after the first daily dose during Month 2 (Month 2, Hour 4 [M1H4]), 4 hours after the second daily dose during Month 2 (Month 2, Hour 28 [M1H28])

**A. Pre-dose (0 hours)**

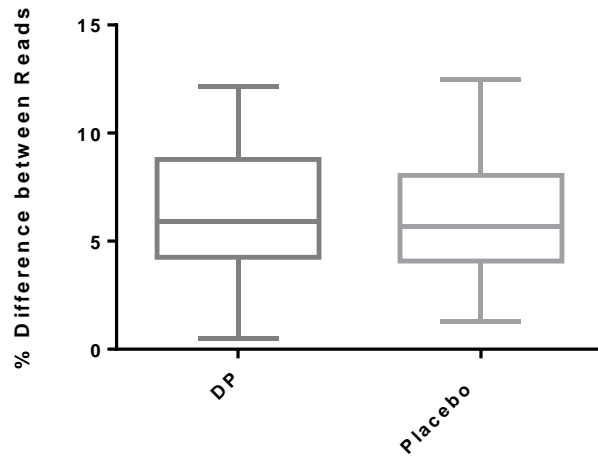

**B. Post-dose (28 hours)**

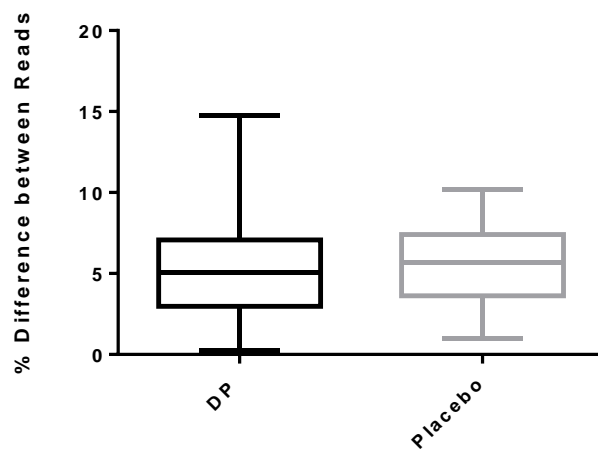

**Figure S2.** Differences between manual and electronic reads of the QTc interval were not significantly different between treatment groups at (A) before the first dose of dihydroartemisinin-piperaquine on Day 1 ( $p=0.96$ ) or (B) after the second dose of dihydroartemisinin-piperaquine on Day 2 ( $p=0.60$ ).

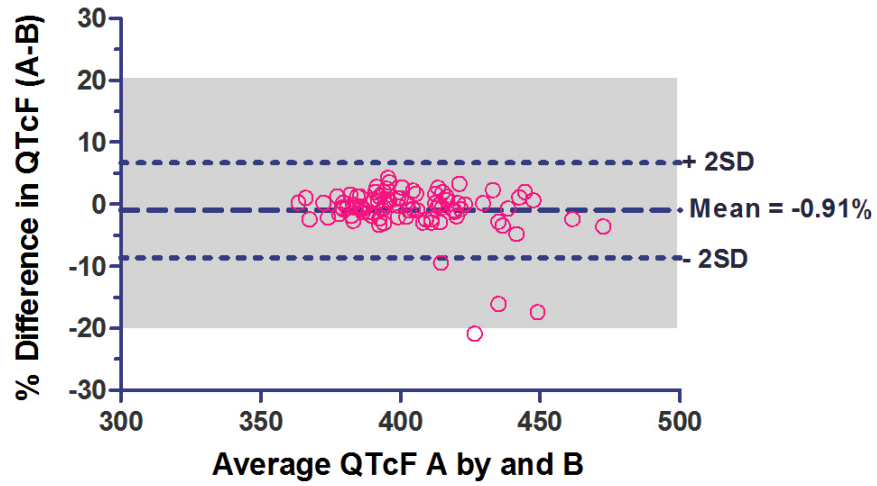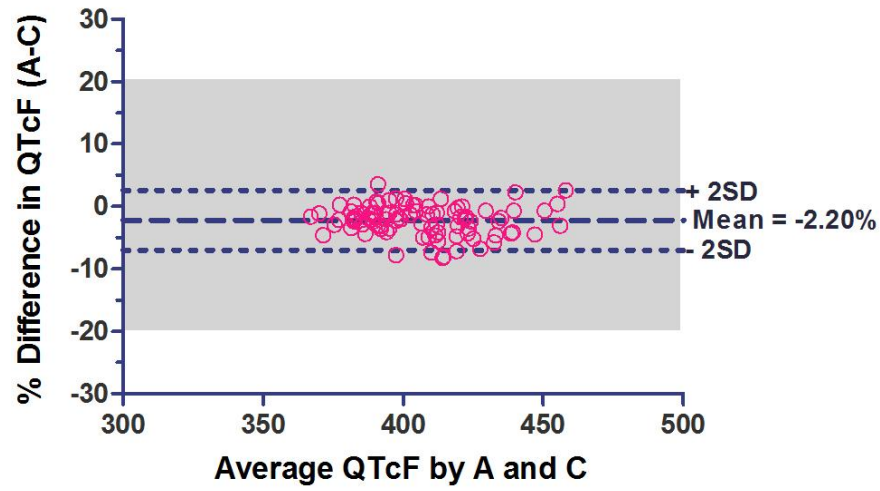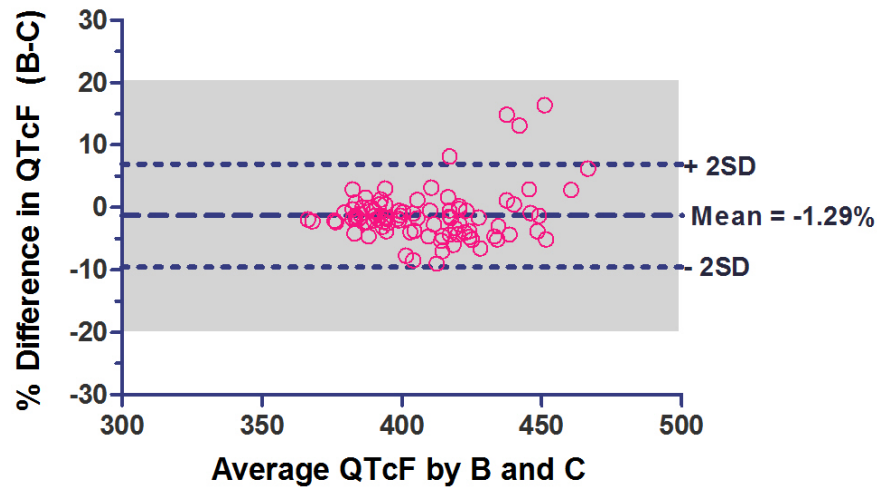

**Figure S3.** There was no significant interreader variability between three blinded ECG readers.

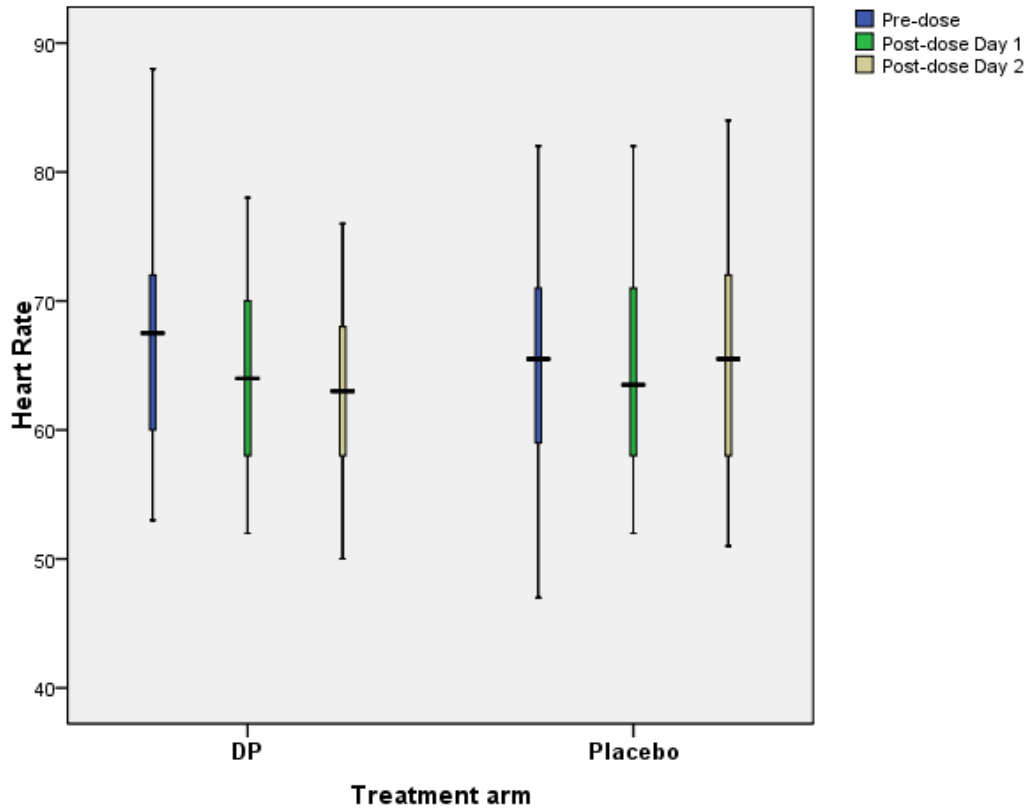

**Figure S4.** Heart rate did not change significantly pre-dose, after the first dose or after the second dose of study drug. It was also not significantly different between groups.

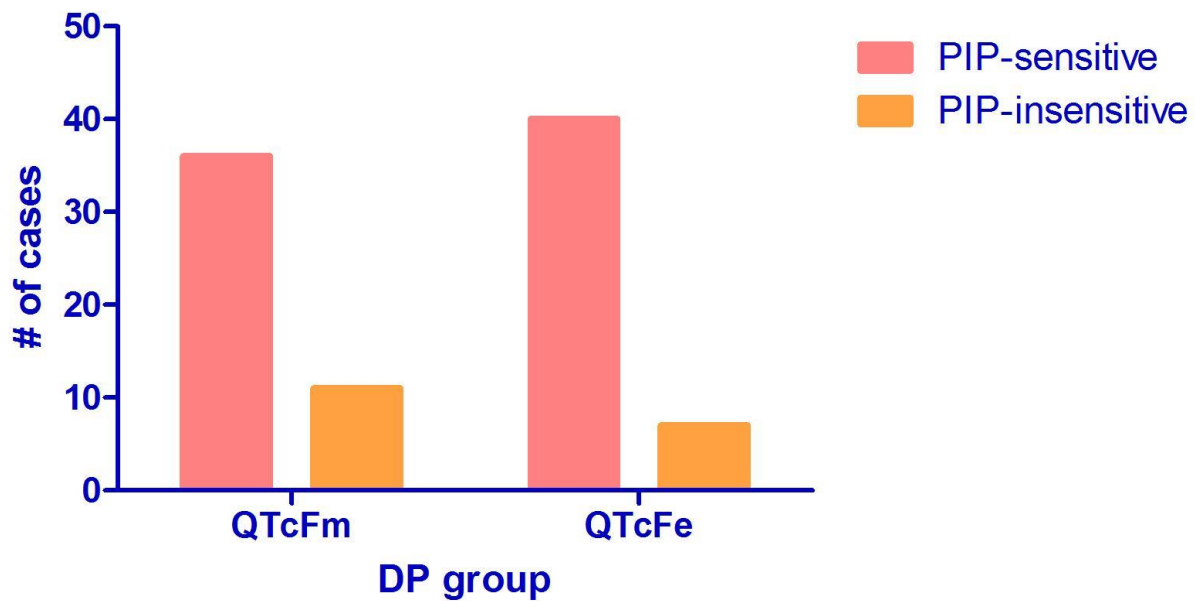

**Figure S5.** Plasma piperazine significantly correlated to QTcF interval change from baseline in 36/47 individuals who received dihydroartemisinin-piperazine based on QTcFm and 40/47 based on QTcFe (R2 with value for  $P < 0.05$ ). Contingency test demonstrated significant effect of piperazine effect on QTc ( $P < 0.0001$ ).

**Table S1. ECG findings before and after dosing of dihydroartemisinin-piperaquine in halted subjects.**

| Subject      | Electronic QTcF |             |             |                     |               | Manual QTcF |             |             |                     |               |
|--------------|-----------------|-------------|-------------|---------------------|---------------|-------------|-------------|-------------|---------------------|---------------|
|              | Predose         | Post Dose 1 | Post Dose 2 | Maximum QT increase | Max %Increase | Predose     | Post Dose 1 | Post Dose 2 | Maximum QT increase | Max %Increase |
| 14           | 417             | 536         |             | 119                 | 29%           | 401         | 466         |             | 65                  | 16%           |
| 15           | 420             | 489         | 544         | 124                 | 30%           | 410         | 457         | 482         | 72                  | 18%           |
| 55           | 436             | 479         | 505         | 69                  | 16%           | 409         | 464         | 486         | 77                  | 19%           |
| 68           | 435             | 469         | 515         | 80                  | 18%           | 415         | 440         | 489         | 74                  | 18%           |
| Avg. DP      | 413             | 439         | 456         | 43                  | 10%           | 390         | 420         | 441         | 51                  | 13%           |
| Avg. Placebo | 415             | 418         | 414         | 3                   | 1%            | 391         | 396         | 396         | 5                   | 1%            |

**Table S2. Adverse Events Rates per treatment arm**

| Preferred Term                 | Response | DHA_piperaquine<br>(N= 47) | Placebo<br>(N= 22) | P value |
|--------------------------------|----------|----------------------------|--------------------|---------|
| Abdominal discomfort           | Yes      | 1(2.13)                    | 0(0.00)            | 1.0000  |
|                                | No       | 46(97.87)                  | 22(100.0)          |         |
| Abdominal pain                 | Yes      | 1(2.13)                    | 1(4.55)            | 0.5392  |
|                                | No       | 46(97.87)                  | 21(95.45)          |         |
| Abdominal pain upper           | Yes      | 1(2.13)                    | 0(0.00)            | 1.0000  |
|                                | No       | 46(97.87)                  | 22(100.0)          |         |
| Arthralgia                     | Yes      | 1(2.13)                    | 1(4.55)            | 0.5392  |
|                                | No       | 46(97.87)                  | 21(95.45)          |         |
| Body tinea                     | Yes      | 1(2.13)                    | 0(0.00)            | 1.0000  |
|                                | No       | 46(97.87)                  | 22(100.0)          |         |
| Chest discomfort               | Yes      | 2(4.26)                    | 0(0.00)            | 1.0000  |
|                                | No       | 45(95.74)                  | 22(100.0)          |         |
| Cough                          | Yes      | 3(6.38)                    | 0(0.00)            | 0.5461  |
|                                | No       | 44(93.62)                  | 22(100.0)          |         |
| Dermatitis atopic              | Yes      | 1(2.13)                    | 0(0.00)            | 1.0000  |
|                                | No       | 46(97.87)                  | 22(100.0)          |         |
| Diarrhoea                      | Yes      | 1(2.13)                    | 0(0.00)            | 1.0000  |
|                                | No       | 46(97.87)                  | 22(100.0)          |         |
| Dizziness                      | Yes      | 14(29.79)                  | 2(9.09)            | 0.0713  |
|                                | No       | 33(70.21)                  | 20(90.91)          |         |
| Electrocardiogram QT prolonged | Yes      | 26(55.32)                  | 0(0.00)            | <0.0001 |
|                                | No       | 21(44.68)                  | 22(100.0)          |         |
| Eye irritation                 | Yes      | 1(2.13)                    | 0(0.00)            | 1.0000  |
|                                | No       | 46(97.87)                  | 22(100.0)          |         |
| Fatigue                        | Yes      | 3(6.38)                    | 0(0.00)            | 0.5461  |
|                                | No       | 44(93.62)                  | 22(100.0)          |         |
| Gastritis                      | Yes      | 0(0.00)                    | 3(13.64)           | 0.0294  |
|                                | No       | 47(100.0)                  | 19(86.36)          |         |
| Headache                       | Yes      | 9(19.15)                   | 2(9.09)            | 0.4822  |
|                                | No       | 38(80.85)                  | 20(90.91)          |         |
| Helminthic infection           | Yes      | 2(4.26)                    | 1(4.55)            | 1.0000  |
|                                | No       | 45(95.74)                  | 21(95.45)          |         |
| Herpes zoster                  | Yes      | 1(2.13)                    | 0(0.00)            | 1.0000  |
|                                | No       | 46(97.87)                  | 22(100.0)          |         |
| Hypomagnesaemia                | Yes      | 1(2.13)                    | 0(0.00)            | 1.0000  |
|                                | No       | 46(97.87)                  | 22(100.0)          |         |
| Influenza like illness         | Yes      | 0(0.00)                    | 1(4.55)            | 0.3188  |

|                            |     |           |           |        |
|----------------------------|-----|-----------|-----------|--------|
|                            | No  | 47(100.0) | 21(95.45) |        |
| Leptospirosis              | Yes | 1(2.13)   | 0(0.00)   | 1.0000 |
|                            | No  | 46(97.87) | 22(100.0) |        |
| Malaise                    | Yes | 1(2.13)   | 0(0.00)   | 1.0000 |
|                            | No  | 46(97.87) | 22(100.0) |        |
| Malaria                    | Yes | 10(21.28) | 13(59.09) | 0.0028 |
|                            | No  | 37(78.72) | 9(40.91)  |        |
| Musculoskeletal chest pain | Yes | 1(2.13)   | 0(0.00)   | 1.0000 |
|                            | No  | 46(97.87) | 22(100.0) |        |
| Musculoskeletal pain       | Yes | 1(2.13)   | 1(4.55)   | 0.5392 |
|                            | No  | 46(97.87) | 21(95.45) |        |
| Myalgia                    | Yes | 1(2.13)   | 0(0.00)   | 1.0000 |
|                            | No  | 46(97.87) | 22(100.0) |        |
| Nail infection             | Yes | 0(0.00)   | 1(4.55)   | 0.3188 |
|                            | No  | 47(100.0) | 21(95.45) |        |
| Nasopharyngitis            | Yes | 6(12.77)  | 2(9.09)   | 1.0000 |
|                            | No  | 41(87.23) | 20(90.91) |        |
| Nausea                     | Yes | 11(23.40) | 2(9.09)   | 0.2001 |
|                            | No  | 36(76.60) | 20(90.91) |        |
| Neck pain                  | Yes | 1(2.13)   | 0(0.00)   | 1.0000 |
|                            | No  | 46(97.87) | 22(100.0) |        |
| Oral herpes                | Yes | 1(2.13)   | 0(0.00)   | 1.0000 |
|                            | No  | 46(97.87) | 22(100.0) |        |
| Oropharyngeal pain         | Yes | 2(4.26)   | 0(0.00)   | 1.0000 |
|                            | No  | 45(95.74) | 22(100.0) |        |
| Pyrexia                    | Yes | 2(4.26)   | 0(0.00)   | 1.0000 |
|                            | No  | 45(95.74) | 22(100.0) |        |
| Rash                       | Yes | 0(0.00)   | 1(4.55)   | 0.3188 |
|                            | No  | 47(100.0) | 21(95.45) |        |
| Rash generalised           | Yes | 0(0.00)   | 1(4.55)   | 0.3188 |
|                            | No  | 47(100.0) | 21(95.45) |        |
| Scrub typhus               | Yes | 1(2.13)   | 0(0.00)   | 1.0000 |
|                            | No  | 46(97.87) | 22(100.0) |        |
| Seasonal allergy           | Yes | 1(2.13)   | 0(0.00)   | 1.0000 |
|                            | No  | 46(97.87) | 22(100.0) |        |
| Skin wound                 | Yes | 4(8.51)   | 0(0.00)   | 0.2985 |
|                            | No  | 43(91.49) | 22(100.0) |        |
| Tinea cruris               | Yes | 0(0.00)   | 1(4.55)   | 0.3188 |
|                            | No  | 47(100.0) | 21(95.45) |        |
| Tinea infection            | Yes | 0(0.00)   | 1(4.55)   | 0.3188 |
|                            | No  | 47(100.0) | 21(95.45) |        |



|                                   |     |           |           |        |
|-----------------------------------|-----|-----------|-----------|--------|
| Toothache                         | Yes | 1(2.13)   | 0(0.00)   | 1.0000 |
|                                   | No  | 46(97.87) | 22(100.0) |        |
| Vertigo                           | Yes | 2(4.26)   | 0(0.00)   | 1.0000 |
|                                   | No  | 45(95.74) | 22(100.0) |        |
| Vessel puncture site<br>haematoma | Yes | 0(0.00)   | 1(4.55)   | 0.3188 |
|                                   | No  | 47(100.0) | 21(95.45) |        |
| Vomiting                          | Yes | 2(4.26)   | 1(4.55)   | 1.0000 |
|                                   | No  | 45(95.74) | 21(95.45) |        |
| Wound infection                   | Yes | 0(0.00)   | 1(4.55)   | 0.3188 |
|                                   | No  | 47(100.0) | 21(95.45) |        |

**Table S3. Clinical Vignettes of Halted Participants**

**Box 1.**

**Halted Participant 1**

A 19-year old male without significant past medical history, allergies or recent medication use was screened for the study. Screening vital signs, physical exam, and laboratory values were not clinically significant except for eosinophilia (20.8%) attributed to asymptomatic intestinal helminthiasis (a common finding in this population; please note that he did not receive any antihelminthic treatment during this study). After enrollment, his predose ECG was normal with a QTcFe of 417ms (QTcFm 401ms). He tolerated study drug administration well, but at four hours post-dose, his average QTcFe was 536ms (a grade 3 adverse event representing a 29% increase over baseline, grade 3), though significantly less following manual measurement (466ms QTcFm, grade 1, 16% increase). A pronounced sinus arrhythmia was noted that may have confounded the electronic interpretation. Repeat ECGs performed approximately 30 minutes later showed sustained prolonged QTcFe of 518ms (grade 3, 24% increase), but QTcFm of 460ms (grade 1, 15% increase). Examples of the participant's pre- and post-dose ECG tracings are shown in Figure 2. The volunteer reported mild transient fatigue post-dose but otherwise had no complaints. The following day, repeat ECG had returned to normal with QTcFe of 429ms. Study drug administration was halted. Vignettes for the remaining three subjects can be found in the Supplemental Information. A summary of pre and post-dose measurements for the halted participants is shown in Supplemental Table 3.

## **Halted Participant 2**

A 20-year old male without significant past medical history, allergies, or recent medication use was enrolled in the study. Vital signs and physical exam at screening were unremarkable. Labs included a negative malaria smear; CBC, renal and liver function tests, electrolytes and G6PD activity were normal. Predose ECG was normal with a QTcFe of 420ms (410 ms by manual read)(Figure 1A). He was randomized and administered study drug which was well-tolerated. Average QTcFe at 4 hours post-dose on ECG was 489ms (16% increase, grade 2) but only 457ms (grade 1, 12% increase) by manual read. The next day, he returned for the second dose with QTcFe on pre-dose ECG of 448ms (437ms manual) and a post-dose QTcFe on ECG at 4 hours of 544ms (grade 3, 30% increase over baseline) but only 482ms by manual (grade 2, 18% increase over baseline)(Figure 1B). It decreased to 509ms electronic (grade 3) and 468ms manual (grade 1) within 30 minutes, and then to 477ms electronic (grade 1) and 442 manual within 90 minutes. Due to flattening of T waves in lead II, lead V5 was used for manual reading. The volunteer remained asymptomatic and repeat ECG showed normal QTcFe of 444ms within 24 hours. A blinded DSMB review halted this participant for reasons of an almost undetectable T wave in lead II and a biphasic T-U wave in lead III.

Figure 1A. Pre-dose EKG

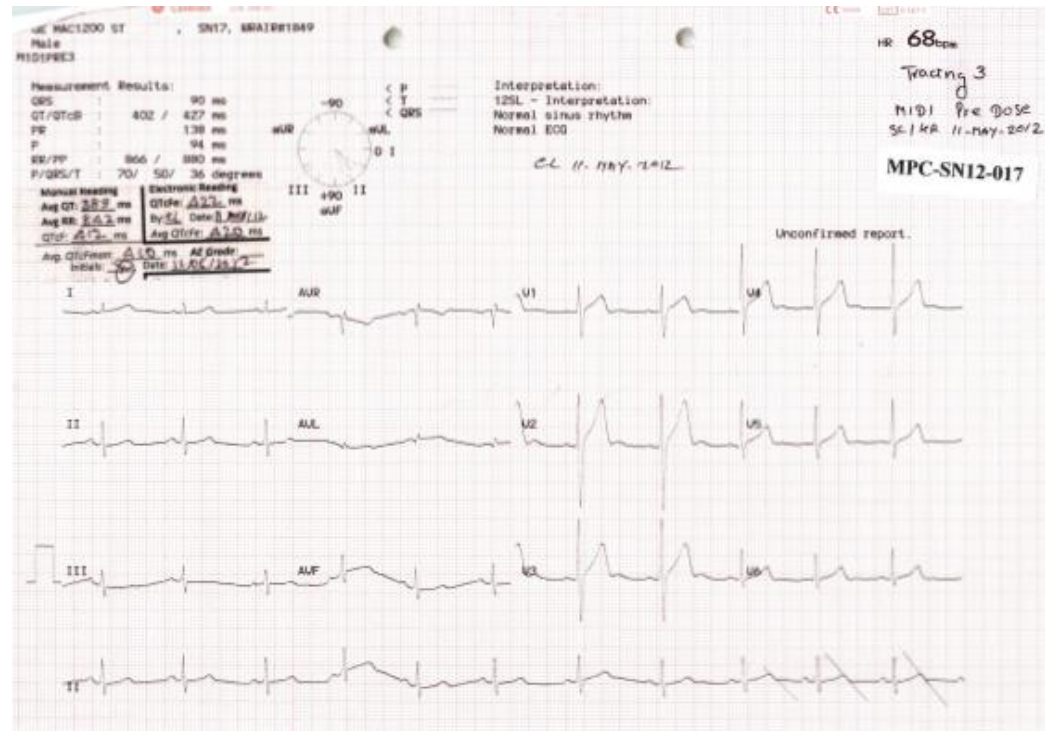

Figure 1B. Day 2 Post-Dose:

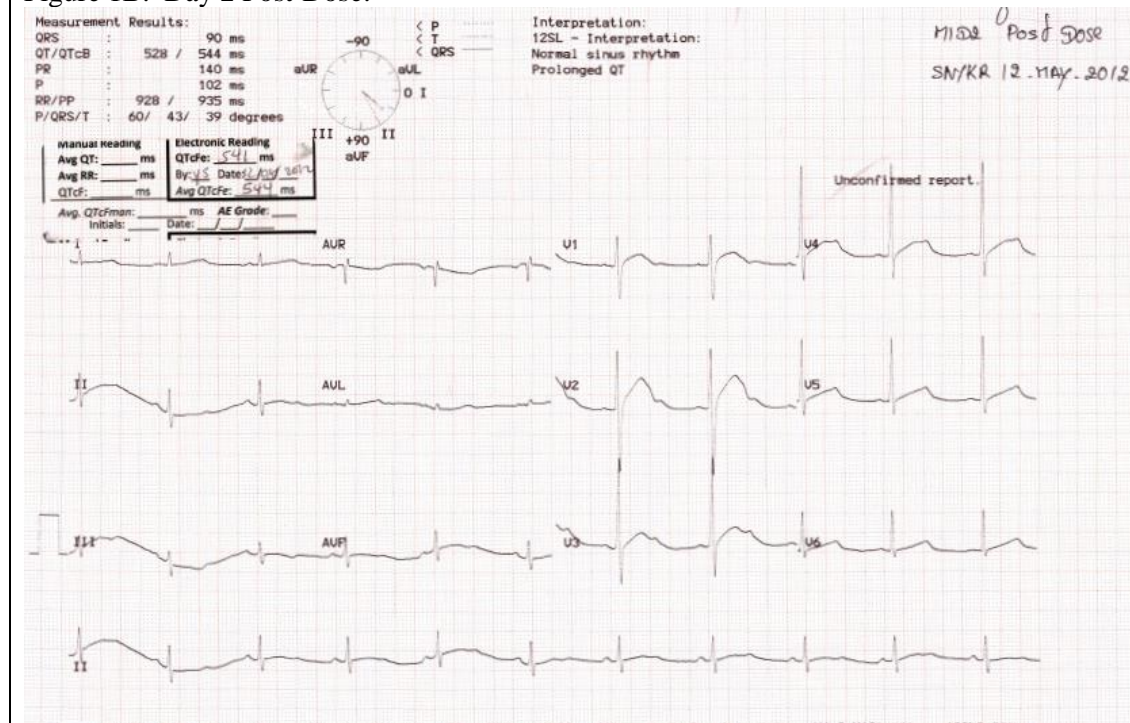

### **Halted Participant 3**

A 32-year old male without significant past medical history was enrolled in the study. At screening, he complained of an upper respiratory infection and muscle aches in the previous week for which he had taken amoxicillin, paracetamol and one other unknown drug that had been stopped a few days prior to screening. His past medical history was significant for an episode of pneumonia with hospitalization in 2004 and appendectomy in 2005. He reported no personal or family history of cardiac disease. He had no known drug allergies, but did report an episode of 'allergy' with itching in the past after ingesting bee larvae, a local delicacy. He reported that he smoked two packs of cigarettes daily and drank alcohol three times per week. He had four episodes of malaria in 2009, but none in the past year. At screening, his vital signs and exam were unremarkable. Laboratory testing demonstrated normal electrolytes and G6PD activity. He was randomized to receive the study drug but vomited the first dose after thirty minutes had elapsed. An additional half dose of test article (2.25 tablets) was administered, per approved method of administration, and tolerated well by the participant [17]. Average QTcFe at 4 hours post-dose was 479 ms (10% increase, grade 1), and 464 ms (grade 1, 14% increase) by manual read. The following day, he returned for the second dose. His pre-dose QTcFe was 440ms (417 ms manually), and a post-dose QTcFe at 4 hours of 505ms (grade 3, 16% increase over baseline) and 486 ms by manual (grade 2, 19% increase over baseline) (Figure 2A). Approximately 1 hour later, it remained elevated to 518ms electronic (grade 3), and 515 ms manual (grade 3 or 26% increase). By 8 hours post-dose, QTcFe had decreased to 473 ms (grade 1) and (464ms manually, grade 1). There were no complaints of palpitations or other cardiac-related symptoms at any time. The subject was halted.

Figure 2A. Pre-dose

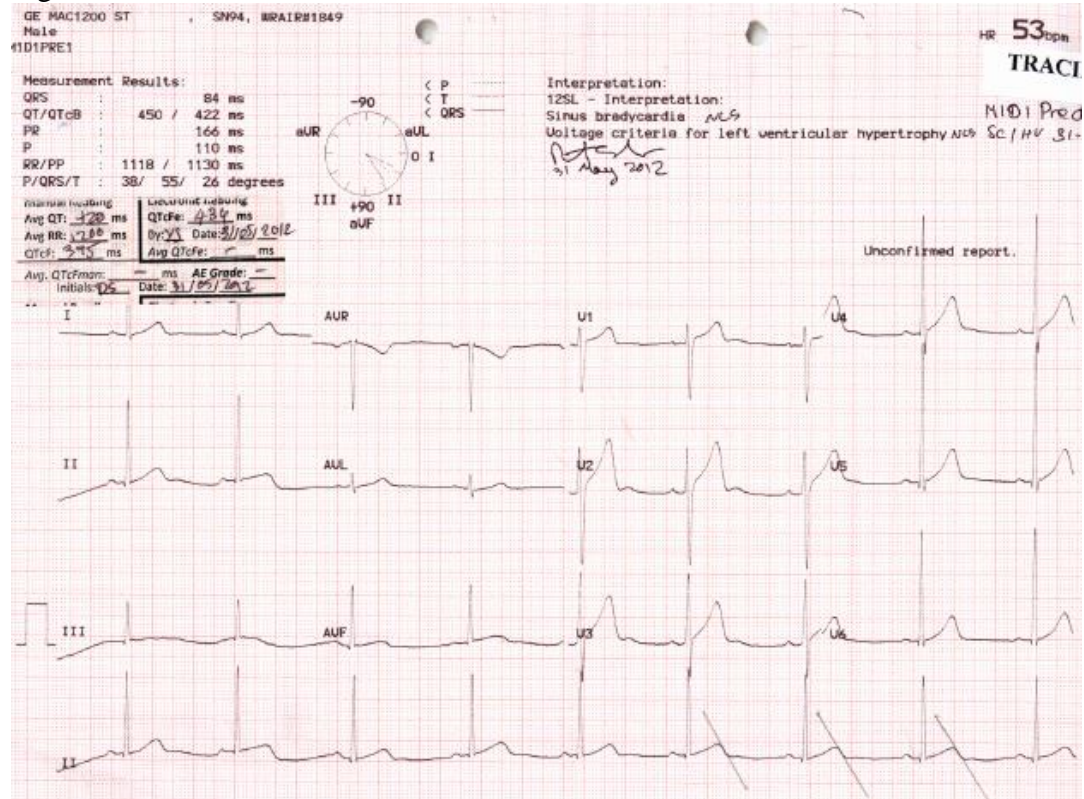

Figure 2B. Day 2 Post-Dose

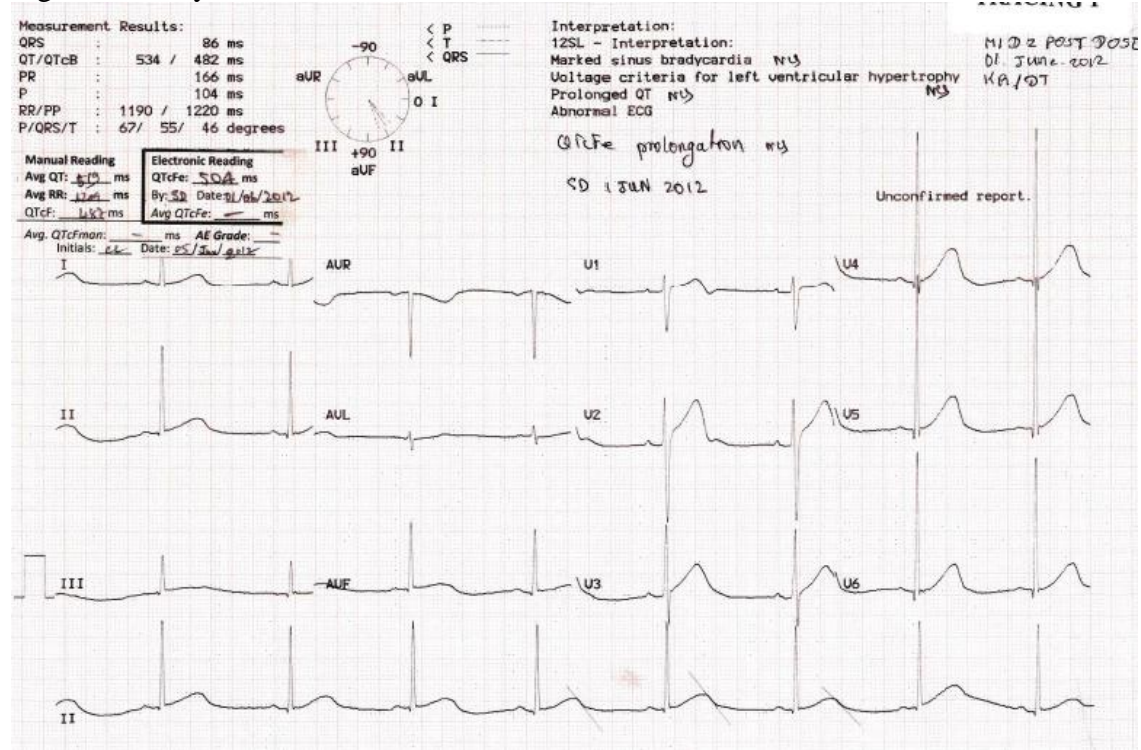



#### **Halted participant 4**

A 36-year old male with no drug allergies or significant cardiac history was enrolled in the study. At screening, he complained of mild abdominal pain, but did not take any medication for this sign. He reported a past medical history that was significant for a motorcycle accident with hospitalization and coma in 2004 and intermittent dyspepsia since 2007 (he takes occasional antacids for relief). He reports taking an unknown local traditional herbal tea preparation daily boiled for general health improvement since January 2012. He smoked 10 cigarettes per day and drank alcohol occasionally. He had two episodes of malaria in 2000, but most recently March 2012. Screening vital signs were normal. On physical exam, he had mild tenderness to palpation over the epigastric region, and several areas of tinea versicolor on his upper back, but otherwise normal. Laboratory evaluation included a negative malaria smear and a normal CBC with the exception of mild neutrophilia (46.2% differential), mild eosinophilia (7.2% differential) and basophilia (2.3% differential). Electrolytes, renal function, and G6PD activity were normal. Predose ECG was normal with a QTcFe of 435ms (415ms by manual read)(Figure 3A). He was randomized and administered study drug. Average QTcFe at 4 hours post-dose on ECG was 469 ms (8% increase, grade 1) and 440ms (grade 1,6% increase) by manual read. The next day, he returned for the second dose with QTcFe on pre-dose ECG of 446ms (430 ms manual), and a post-dose QTcFe on ECG at 4 hours of 515ms (grade 3, 18% increase over baseline) and 489 ms by manual (grade 2,18% increase over baseline). Repeat ECG 15 minutes later was 557 ms by electronic read and 483 ms by manual read (Figure 3B). One hour later, QTcFe remained elevated to 512ms (grade 3) versus 471 ms manual (grade 1 or14% increase over baseline). By 8 hours post-dose, QTcFe dropped to 463 ms (grade 1 or 9% increase) and 452ms manual (grade 1 or 9% increase).The volunteer remained asymptomatic but was halted from study.

Figure 3A. Day 1 Pre-dose

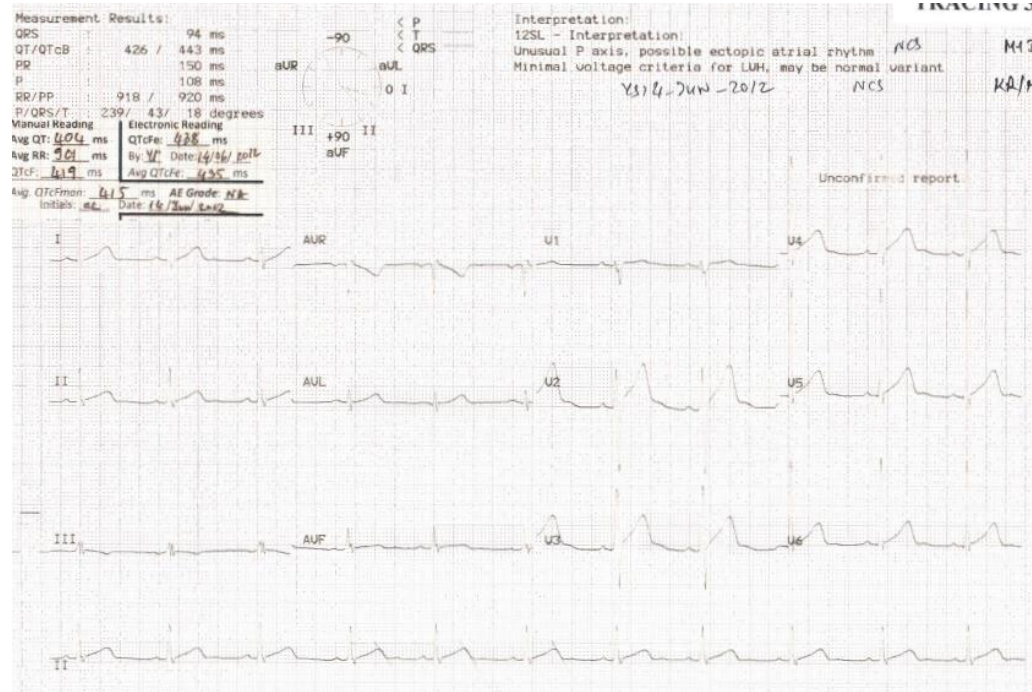

Figure 3B. Day 2 Post-dose

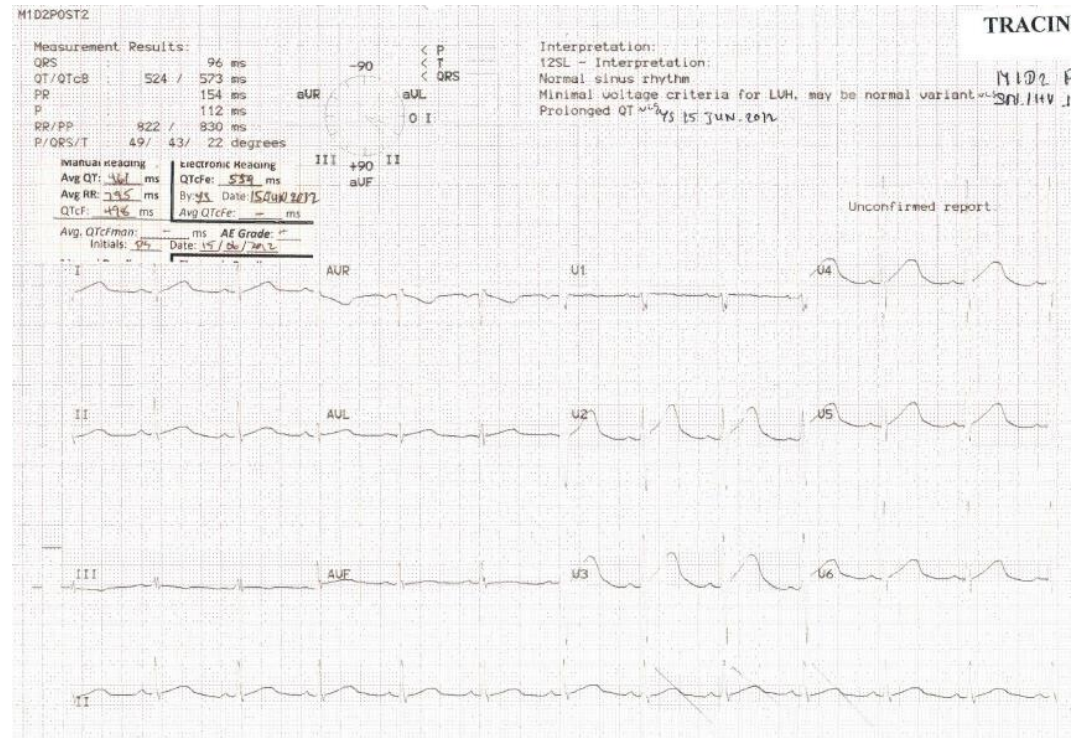

Supplement: AAC.02667-14_zac010143328so1.pdf [file AAC.02667-14_zac010143328so1.pdf]
